# Supplementary material for: The Quality and Bacterial Community Changes in Freshwater Crawfish Stored at 4 °C in Vacuum Packaging
Source: MDPI journal article supplement (doi:10.3390/molecules27238618), 2022-12-06
Supplement: s1 [file s1]

Table S1 Observed valid sequence and OUT numbers in different samples

| sample              | Total reads | Identified reads | OUTs |
|---------------------|-------------|------------------|------|
| C-0-D <sub>0</sub>  | 14892       | 14466            | 193  |
| C-0-D <sub>12</sub> | 19965       | 19802            | 41   |

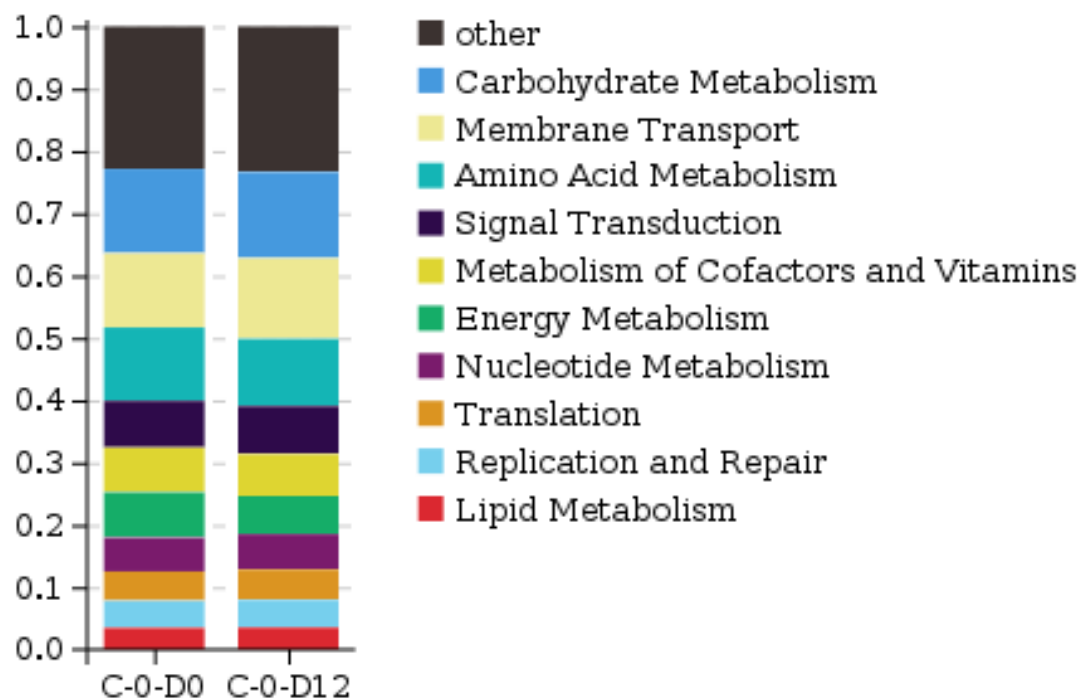

Figure.S1 Function stacking map

Table S2 Techniques in monitoring spoilage microbiota

| Techniques                                             | Crustaceans                     | Bacteria                                                                                                                                                                                                                                                          | Level   | Alpha diversity                          | References |
|--------------------------------------------------------|---------------------------------|-------------------------------------------------------------------------------------------------------------------------------------------------------------------------------------------------------------------------------------------------------------------|---------|------------------------------------------|------------|
| 16s rRNA high-throughput<br>Next-generation sequencing | <i>Procambarus clarkia</i>      | <i>Aeromonas</i> , <i>Macrococcus</i> , <i>Vibrio</i> sp., <i>Acinetobacter</i> ,<br><i>Citrobacter</i> , <i>Enterobacter</i>                                                                                                                                     | Genus   | Shannon index 2.5<br>Simpson index 0.148 | [52]       |
|                                                        | <i>Procambarus clarkii</i>      | <i>Shewanella</i> sp., <i>Carnobacterium</i> sp., <i>Brochothrix</i> sp.,<br><i>Psychrobacter</i> sp., <i>Vagococcus</i> sp., <i>Acinetobacter</i> sp.                                                                                                            | Genus   | Shannon index 6.58<br>Simpson index 0.97 | [53]       |
|                                                        | <i>Litopenaeus vannamei</i>     | <i>Vibrio</i> , <i>Candidatus</i> , <i>Bacilloplama</i> ,<br><i>Photobacterium</i> , <i>Candidatus</i> , <i>Bacilloplama</i>                                                                                                                                      | Genus   |                                          | [54]       |
|                                                        | <i>Penaeus vannamei</i>         | <i>Proteobacteria</i> <i>Sphingomonas</i> ,<br><i>Carnobacterium</i> , <i>Psychrobacter</i> , <i>Psychro-</i><br><i>bacter</i> , <i>Pseudomonas</i> , <i>Shewanella</i> ,<br><i>Acinetobacter</i> , <i>Vibrio</i>                                                 | Genus   |                                          | [55]       |
|                                                        | <i>Litopenaeus vannamei</i>     | <i>Pseudoalteromonas</i> , <i>Aliivibrio</i> ,<br><i>Photobacterium</i>                                                                                                                                                                                           | Genus   |                                          | [56]       |
|                                                        | <i>Parapenaeus Longirostris</i> | <i>Psychrobacter</i> , <i>Brevundimonas</i> , <i>Stenotrophomonas</i> ,<br><i>Staphylococcus</i> , <i>Legionella</i> , <i>Acinetobacter</i> ,<br><i>Bacillus</i> , <i>Escherichia-Shigella</i> , <i>Enterococcus</i> ,<br><i>Enterobacter</i> , <i>Klebsiella</i> | Genus   |                                          | [57]       |
|                                                        | <i>Solenocera melantho</i>      | <i>Vagococcus</i> , <i>Shewanella</i> , <i>Pseudomonas</i> ,<br><i>Psychrobacter</i> , <i>Trichococcus</i>                                                                                                                                                        | Genus   |                                          | [58]       |
|                                                        | <i>Pacific White Shrimp</i>     | <i>Acinetobacter</i> , <i>Psychrobacter</i> , <i>Shewanella</i> ,<br><i>Carnobacterium</i> , <i>Pseudomonas</i> , <i>Vibrio</i>                                                                                                                                   | Genus   |                                          | [59]       |
|                                                        | <i>Ctenopharyngodon idellus</i> | <i>Pseudomonas</i> , <i>Aeromonas</i> , <i>Shewanella</i>                                                                                                                                                                                                         | Genus   |                                          | [60]       |
|                                                        | <i>Procambarus clarkii</i>      | <i>Aeromonas jandaei</i>                                                                                                                                                                                                                                          | Species |                                          | [61]       |
| 16S rRNA sequencing                                    | <i>Litopenaeus Vannamei</i>     | <i>lactic acid bacteria</i> , <i>Pseudomonas</i> spp.,<br><i>Shewanella</i> spp., <i>Aeromonas</i> spp.                                                                                                                                                           | Genus   |                                          | [62]       |

|                                   |                               |                                                                                                                                                      |         |                          |      |
|-----------------------------------|-------------------------------|------------------------------------------------------------------------------------------------------------------------------------------------------|---------|--------------------------|------|
|                                   | <i>Litopenaeus Vannamei</i>   | <i>Enterobacter, Acinetobacter, Pseudomonas, Aeromonas, Aeromonas, Enterococcus</i>                                                                  | Genus   |                          | [63] |
|                                   | <i>Penaeus notialis</i>       | <i>lactic acid bacteria, Enterobacteriaceae, Pseudomonas spp.</i>                                                                                    | Genus   |                          | [64] |
| <b>Culture dependent API kits</b> | <i>Fenneropenaeus indicus</i> | <i>Actinomyces, Sphingobacterium multivorum, Vibrio proteolyticus, Staphylococcus cohnii, S. auricularis</i>                                         | Species | Simpson index 0.9        | [65] |
| <b>DGGE</b>                       | <i>Exopalaemon Modemus</i>    | <i>Pseudomonas sp., Shewanella, Flavobacterium, Staphylococcus</i>                                                                                   | Genus   |                          | [66] |
|                                   | <i>Crangon crangon</i>        | <i>lactic acid bacteria, Pseudomonas sp., Shewanella, Flavobacterium</i>                                                                             |         |                          |      |
|                                   |                               | <i>Psychrobacter immobilis, Psychrobacter cibarius. Pseudoalteromonas nigrifaciens, Pseudoalteromonas elyakovii, Pseudoalteromonas paragorgicola</i> | Species |                          | [67] |
|                                   |                               | <i>Planococcus, Exiguobacterium, Carnobacterium, Pseudomonas, Chryseobacterium Staphylococcus</i>                                                    |         |                          |      |
| <b>PMA combined with DGGE</b>     | <i>Litopenaeus vannamei</i>   | <i>Acinetobacter sp., Vibrio sp., Aeromonas sp., Lactococcus sp., Exiguobacterium sp., Kurthia sp..</i>                                              | Genus   | Shannon index nearly 2.8 | [60] |
| <b>TTGE</b>                       | <i>Litopenaeus vannamei</i>   | <i>C. maltaromaticum and S. baltica.</i>                                                                                                             | Species |                          | [61] |
